# Supplementary material
Source: Springer Nature journal article supplement (https://www.springermedizin.de/resource/supplementary/13017_2007_76_MOESM1_ESM.pdf/9635492)

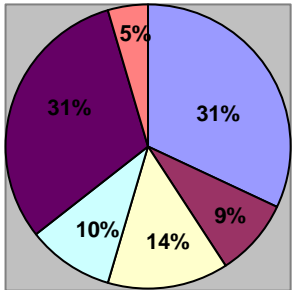

- Phlegmon
- Abscess
- Bleeding
- Stricture/obstruction
- Perforation
- Fistula

Supplement: MOESM1 [file 9635492]
